# Supplementary material for: The Gut Microbiome of the Eastern Spruce Budworm Does Not Influence Larval Growth or Survival
Source: bioRxiv or medRxiv preprint supplement (doi:10.1101/330928), 2020-01-02
Supplement: Supplementary file [file 330928-1.pdf]

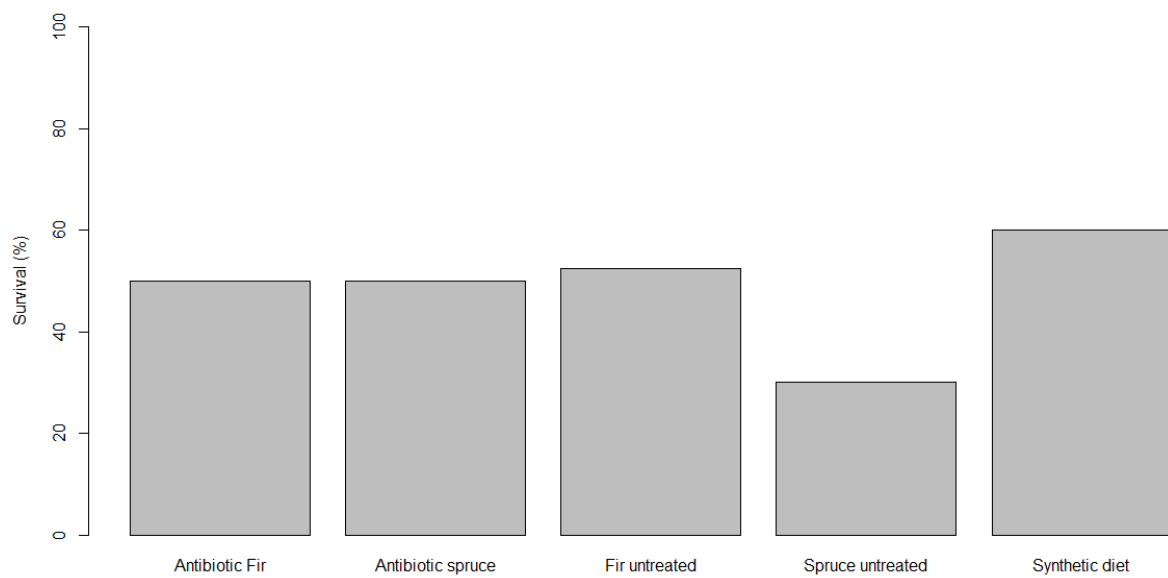

1  
2 Figure S1. Percent survival of spruce budworm larvae among treatment diets (spruce versus fir  
3 foliage and synthetic diet) and antibiotic treatments (AB = antibiotic treatment).

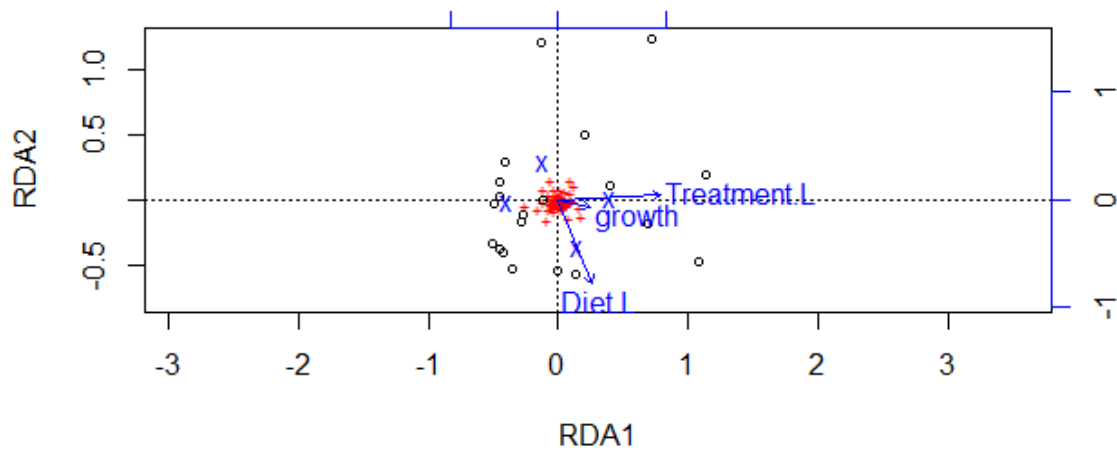

10

11 Figure S2. RDA biplot of foliage-associated communities with the growth rate of larvae feeding  
 12 on foliage, diet, and treatment as explanatory variables. The first axis (constrained - 9.6%) and  
 13 the second axis (unconstrained - 6.3%) account for 15.9 percent of the total variance.

14

15

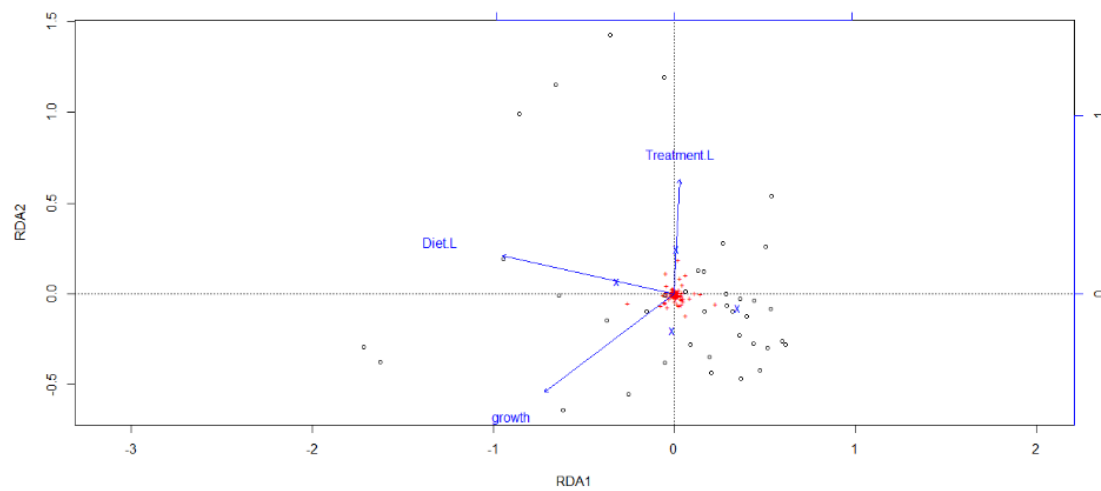

Figure S3. RDA biplot of spruce budworm larval gut communities of individuals that were fed foliage with growth rate, diet, and treatment as explanatory variables. The first axis (constrained - 4.9%) and the second axis (unconstrained - 3.0%) account for 7.98% of the total variance.

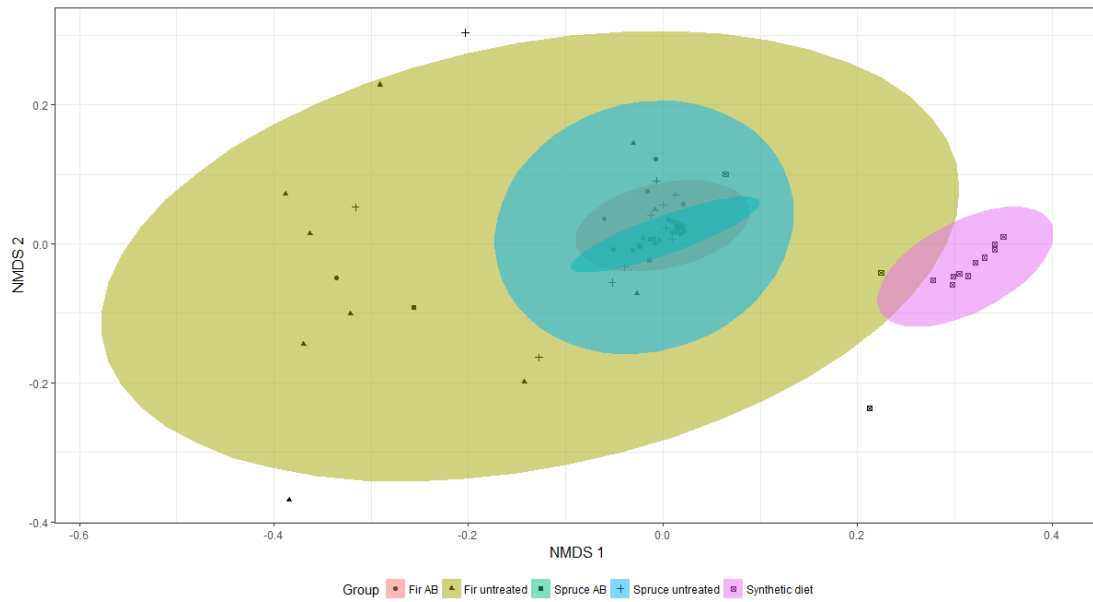

24 A)

25 B)

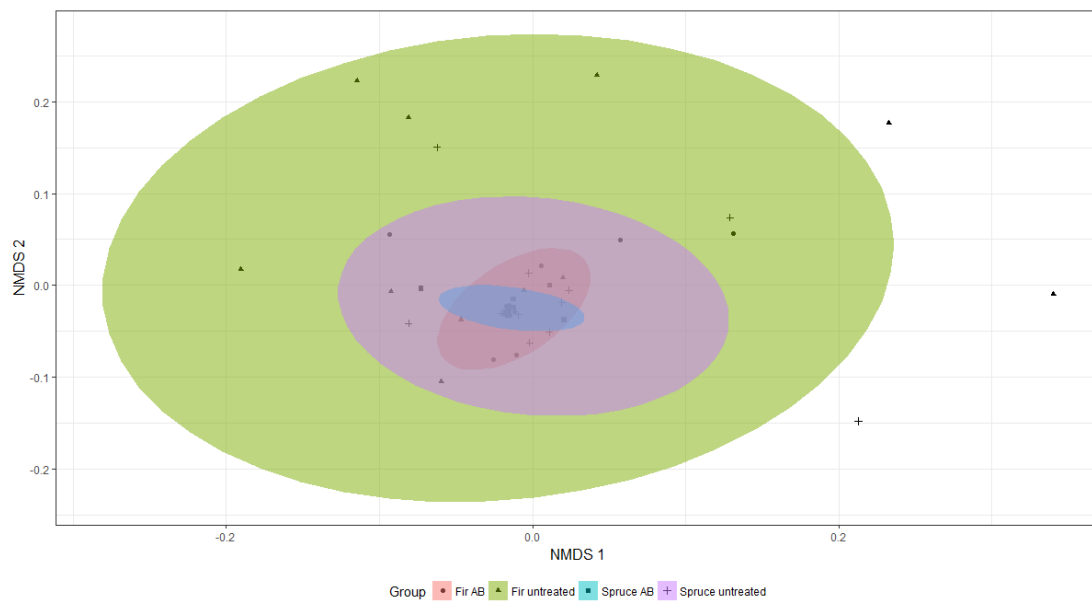

26

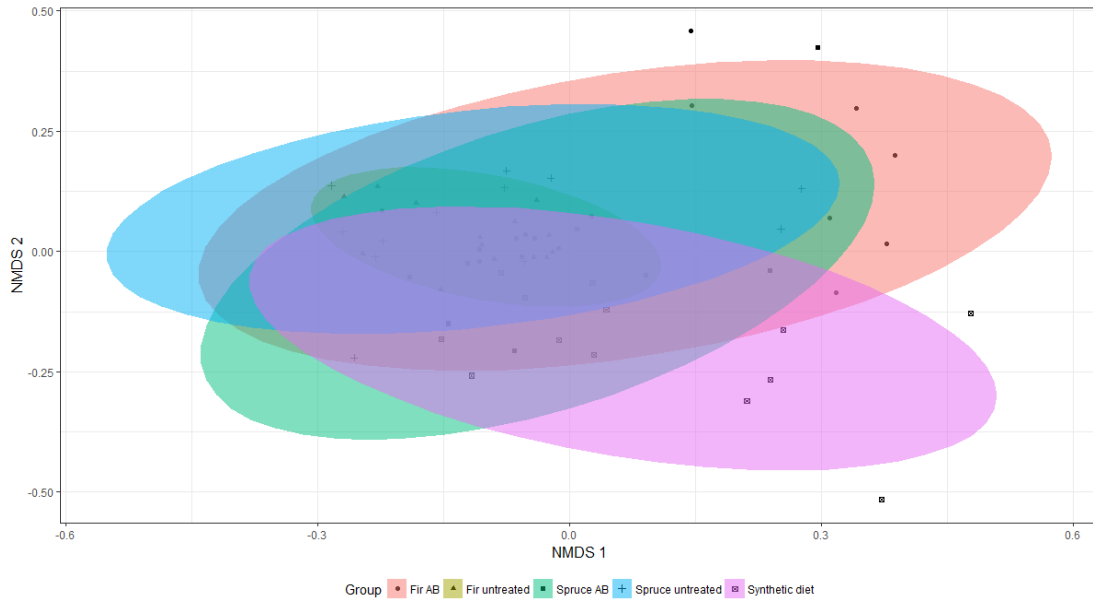

27 C)

28 D)

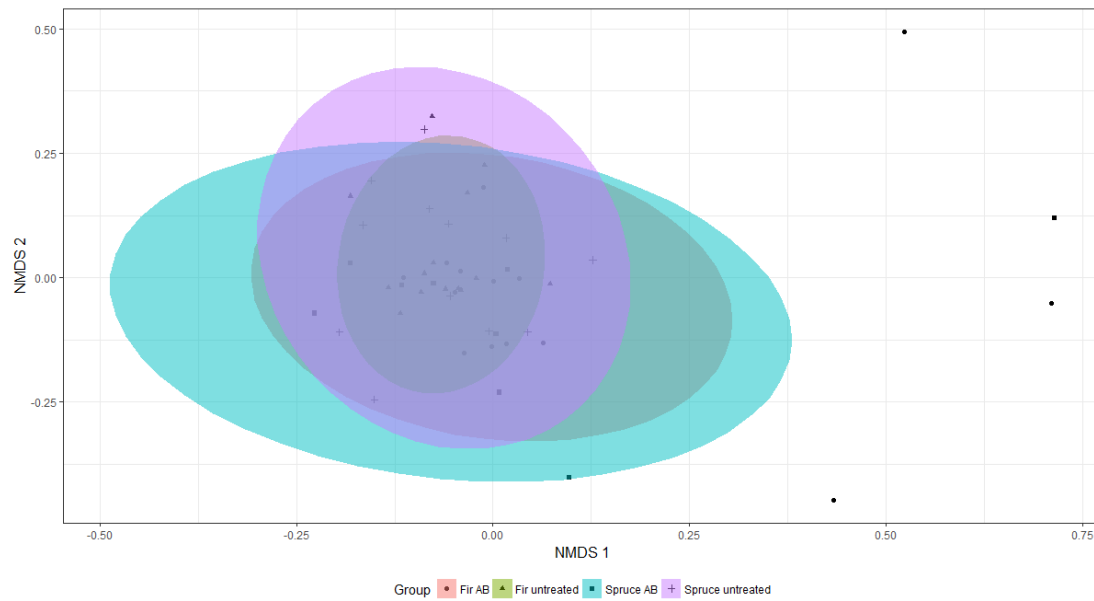

29

30 Figure S4. NMDS ordinations of diet-associated microbial communities based on weighted and  
 31 unweighted UniFrac distances. (A: all diets weighted UniFrac stress =0.13, B: All diets  
 32 unweighted UniFrac stress =0.18, C: only foliage weighted UniFrac stress =0.10, D: only foliage

33 unweighted UniFrac stress =0.20). Ellipses represent 95% confidence intervals around samples  
34 from different treatments (Fir.AB = antibiotic treated fir, Spruce.AB = antibiotic spruce,  
35 Fir.untreated = untreated fir, and Spruce.untreated = untreated spruce)

36

37

38

39

40

41

42

43

44

45

46

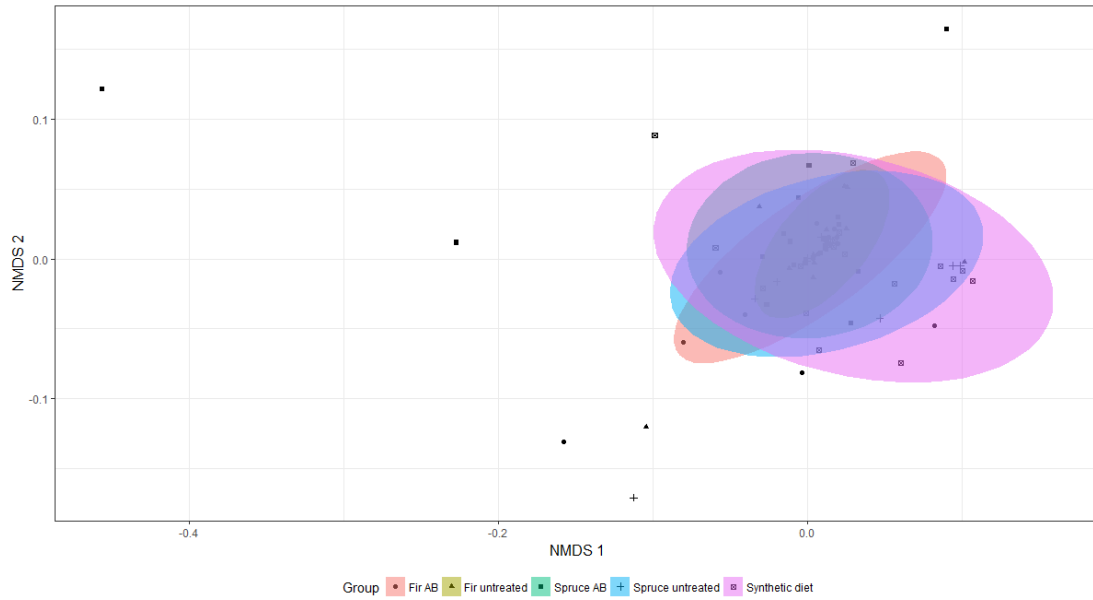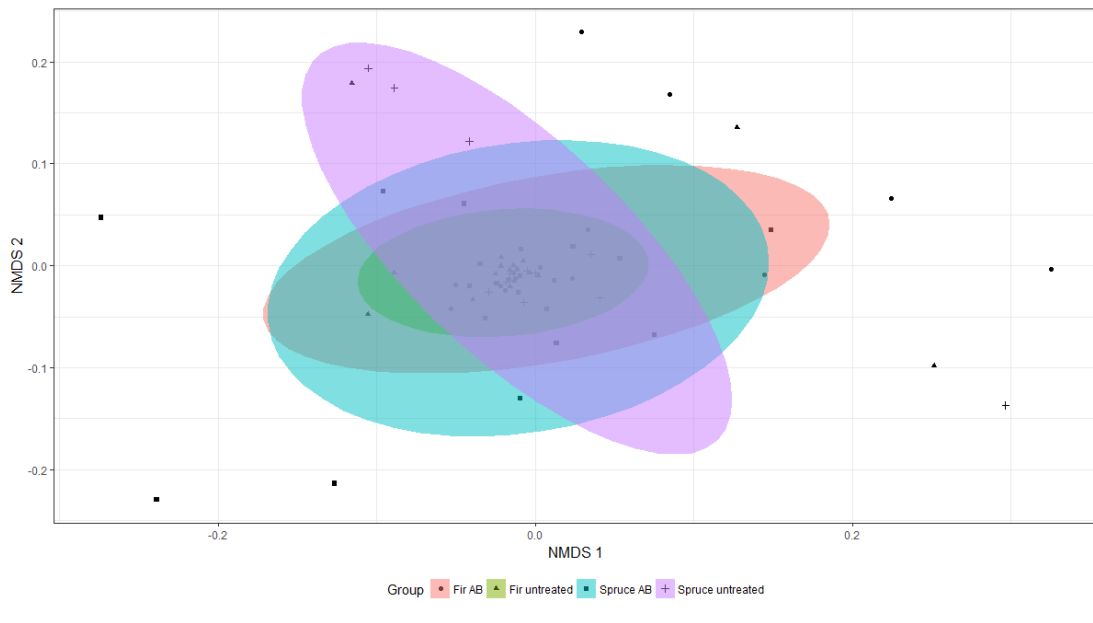

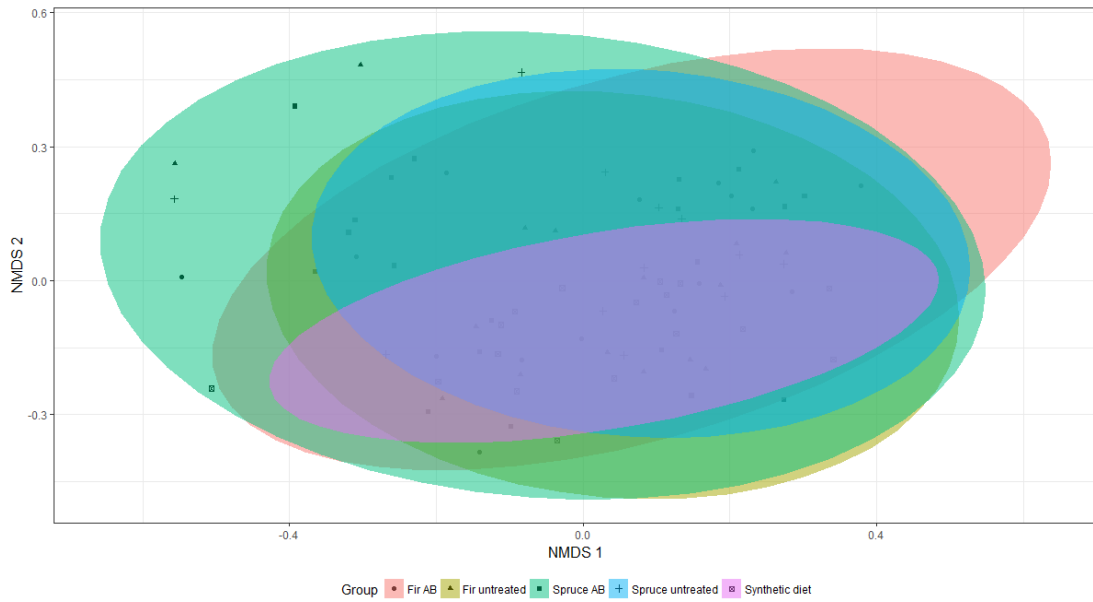

49 C)

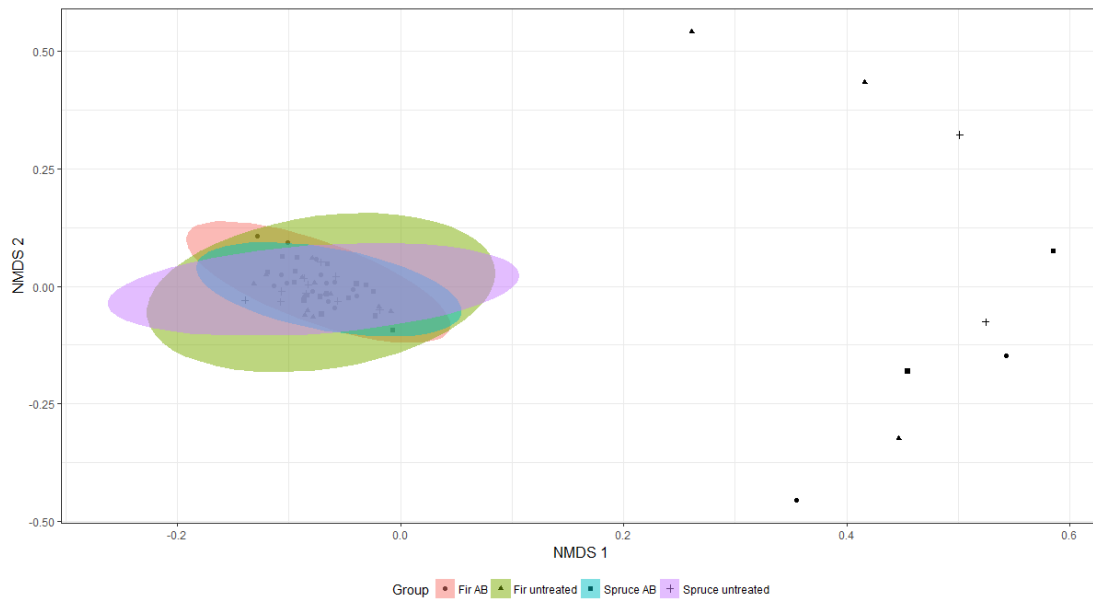

50 D)

51 Figure S5. NMDS ordinations of frass-associated microbial communities based on weighted and  
 52 unweighted UniFrac distances. (A: all frass samples weighted unifrac stress =0.15, B: All frass  
 53 samples UniFrac stress =0.13, C: frass of larvae feeding on foliage weighted UniFrac stress  
 54 =0.10, D: frass of larvae feeding on foliage unweighted UniFrac stress =0.19). Ellipses represent



55 95% confidence intervals around samples from different treatments (Fir.AB = antibiotic treated  
56 fir, Spruce.AB = antibiotic spruce, Fir.untreated = untreated fir, and Spruce.untreated = untreated  
57 spruce).

58

59

60

61

62

63

64

65

66

67

68

69

70 A) (Fir AB)

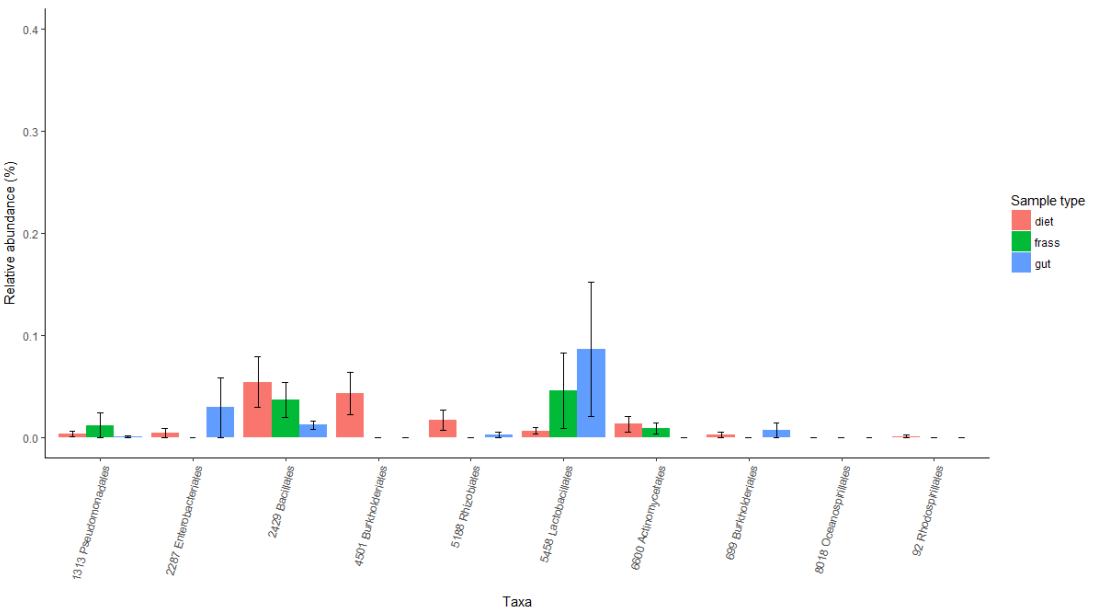

71

72 B) (fir untreated)

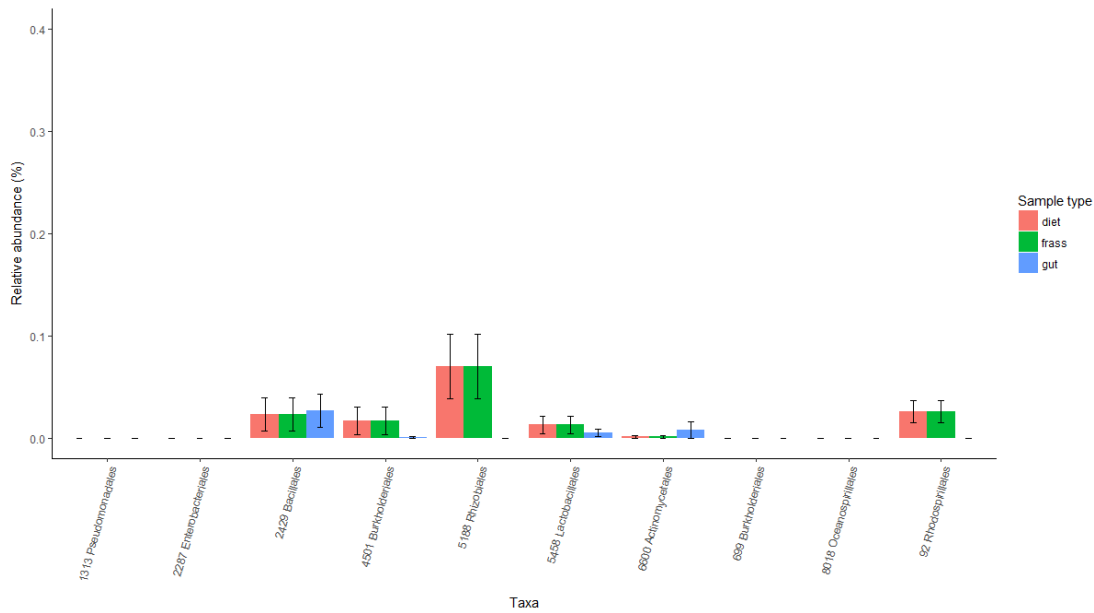

73

74 C) Spruce AB

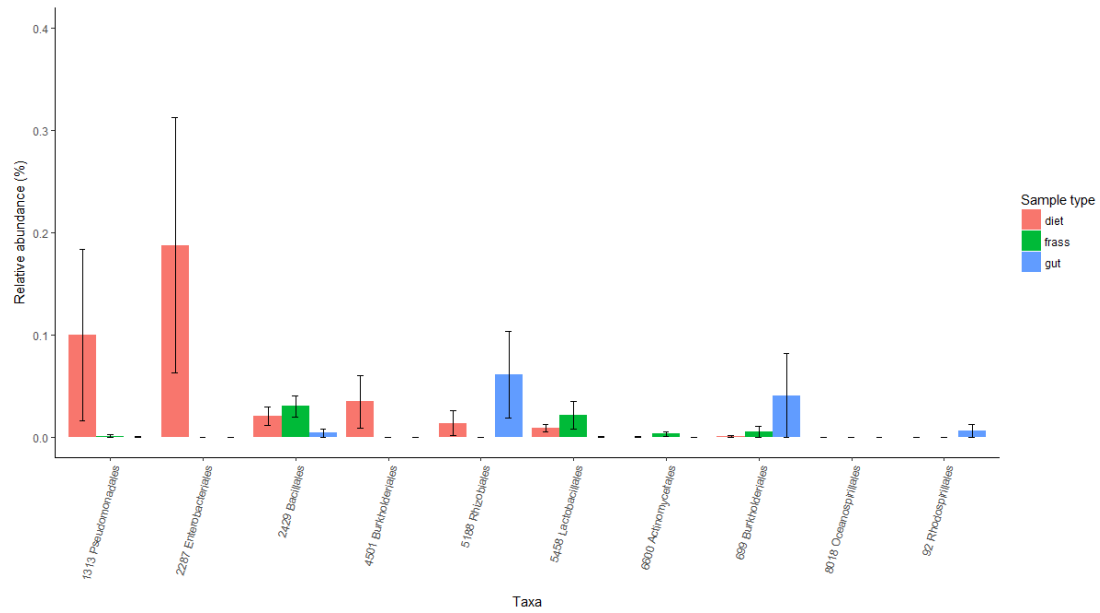

#### D) Spruce untreated

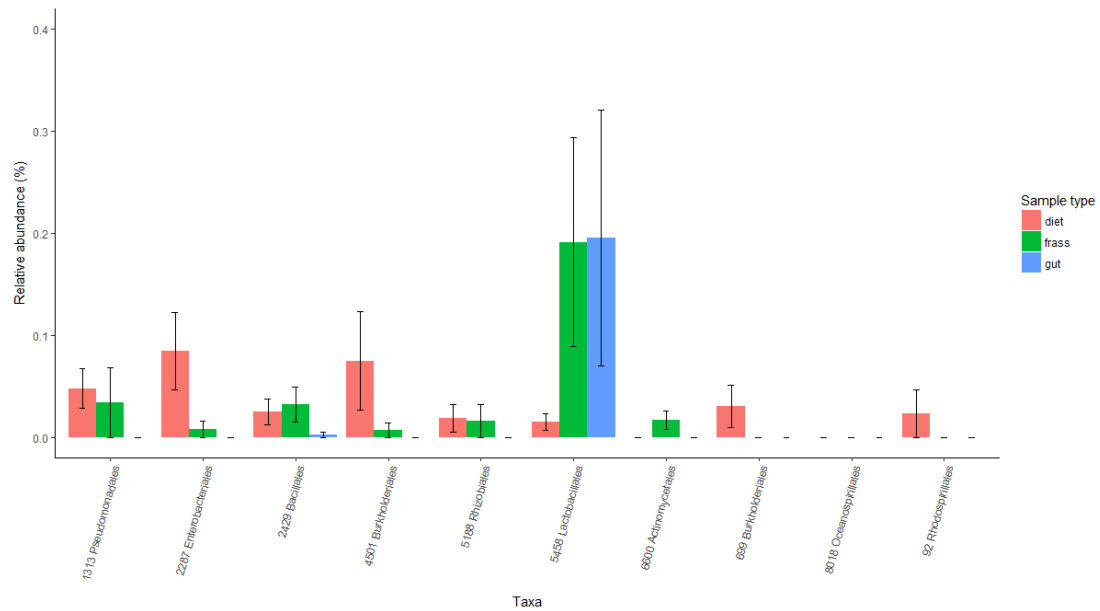

Figure S6. Mean relative abundance ( $\pm$  SE) of OTUs identified as being differentially abundant between comparisons of communities among sample types (diet, guts, and frass) within treatment combinations (fir versus spruce and antibiotic treated vs untreated) based on an ANCOM test (ANCOM; adjusted  $p < 0.05$ ).

82

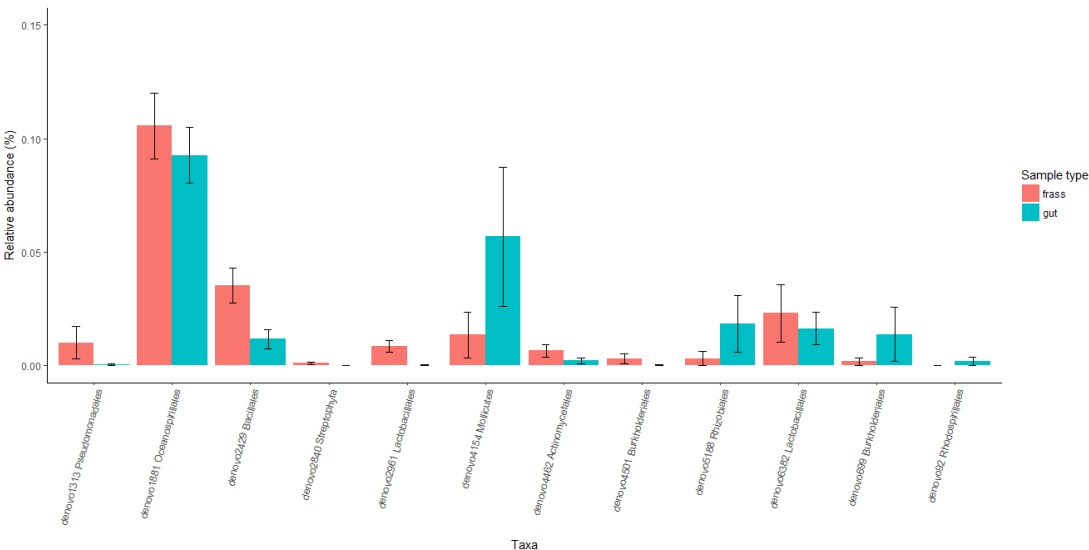

83

84 Figure S7. Mean Relative abundance ( $\pm$  SE) of OTUs identified as being differentially abundant  
85 between comparisons of all frass samples and all gut samples based on an ANCOM test  
86 (ANCOM; adjusted  $p < 0.05$ ). Blue bars represent gut samples and red bars represent frass  
87 samples.

88

89

90

91

92

Table S1: Total replicates sequenced across all sample types and the time in the experiment samples were collected and frozen.

| Sample type    | Time after start of treatments | Replicates sequenced |
|----------------|--------------------------------|----------------------|
| Larval midguts | 14 days                        | 96                   |
| Foliage        | 7 days                         | 50                   |
| Foliage        | 14 days                        | 51                   |
| Frass          | 7 days                         | 50                   |
| Frass          | 14 days                        | 49                   |

101 Table S2: Statistical tests used in this study along with the hypothesis tested, the variables used,  
102 and the type of data used to

| Test                             | Hypothesis tested                                                          | Variables                                                                                             | Type of data used                                                                                           |
|----------------------------------|----------------------------------------------------------------------------|-------------------------------------------------------------------------------------------------------|-------------------------------------------------------------------------------------------------------------|
| Mixed-effects model              | Diet and antibiotic treatment will influence growth                        | Weight ,<br>Diet type,<br>Antibiotic treatment,<br>Time                                               | Log transformed weight values of individual larvae recorded every two days for 2 weeks                      |
| Logistic regression              | Diet and antibiotic treatment will affect larval survival                  | Mortality                                                                                             | Mortality- Binary response                                                                                  |
| Redundancy analysis (RDA)        | Gut microbial communities are correlated with larval growth                | Diet type,<br>Antibiotic treatment,<br>Gut community composition                                      | Growth rates of each larva and relative abundances of OTUs detected in midgut samples.                      |
| Redundancy analysis (RDA)        | Foliage-associated microbial communities are correlated with larval growth | Diet type,<br>Antibiotic treatment,<br>Foliage-associated community composition                       | Growth rates of each larva and relative abundances of OTUs detected in foliage samples.                     |
| Permutational multivariate ANOVA | Gut community composition is different among fast and slow growing larvae  | Gut community composition<br>Growth class(based on growth rate, defined as upper and lower quartiles) | Square root transformed UniFrac distance matrix (weighted by the relative abundance of taxa and unweighted) |
| ANOVA                            | Diet and antibiotic treatment will affect microbial alpha diversity        | Diet type,<br>Antibiotic treatment                                                                    | Shannon diversity calculated using relative abundances of OTUs                                              |

|                                                          |                                                                                         |                                                                     |                                                                                                                         |
|----------------------------------------------------------|-----------------------------------------------------------------------------------------|---------------------------------------------------------------------|-------------------------------------------------------------------------------------------------------------------------|
| Permutational<br>multivariate ANOVA                      | Gut microbial community<br>composition will differ<br>among diets and                   | Diet type,<br>Antibiotic treatment,<br>Gut community<br>composition | Square root transformed<br>UniFrac distance matrix<br>(weighted by the relative<br>abundance of taxa and<br>unweighted) |
| Analysis of the<br>composition of<br>microbiomes (ANCOM) | What sample type (guts,<br>foliage, or frass) are<br>individual OTUs<br>associated with | Sample type                                                         | Relative abundance of<br>OTUs                                                                                           |

103

104

105

106

107

108

109

110

111

112 Table S3. Estimates of the influence time, antibiotic treatment, and diet on the weight of spruce  
 113 budworm larvae exposed to different diet and antibiotic treatments. Results represent ANOVA  
 114 analysis of a mixed effect model with time, antibiotic treatment, and diet and their interactions as  
 115 fixed factors and time nested within individual as random factors. In our model time as a fixed  
 116 effect represents the growth rate of larvae and significant interactions between Time and other  
 117 factors indicate that growth rates differed among treatment combinations.

| Variable            | F value | P value |
|---------------------|---------|---------|
| Intercept           | 16637.5 | <.0001  |
| Time                | 751.8   | <.0001  |
| Treatment           | 5.78    | 0.018   |
| Diet                | 3.2     | 0.076   |
| Time:Treatment      | 3.0     | 0.081   |
| Time:Diet           | 33.9    | <.0001  |
| Treatment:Diet      | 3.8     | 0.056   |
| Time:Treatment:Diet | 2.1     | 0.151   |

118



Table S4. Pairwise comparisons of growth rate estimates for spruce budworm larvae within treatment groups as determined by a Tukey's Honest Significant Difference post-hoc test based on a mixed effect model with time, antibiotic treatment, and diet as fixed factors and time nested within individual as random factors.

| Contrast                                  | Estimate | Standard error | Degrees of freedom | T ratio | P value |
|-------------------------------------------|----------|----------------|--------------------|---------|---------|
| Antibiotic fir versus antibiotic spruce   | -0.0290  | 0.0054         | 483                | -5.339  | <.0001  |
| Antibiotic fir versus untreated fir       | -0.0012  | 0.0054         | 483                | -0.232  | 0.9956  |
| Antibiotic fir versus untreated spruce    | -0.0184  | 0.0063         | 483                | -2.92   | 0.0191  |
| Antibiotic spruce versus untreated Fir    | 0.0278   | 0.0053         | 483                | 5.165   | <.0001  |
| Antibiotic spruce versus untreated spruce | 0.0106   | 0.0062         | 483                | 1.693   | 0.3284  |
| Untreated fir versus untreated spruce     | -0.0171  | 0.0062         | 483                | -2.744  | 0.0319  |

125 Table S5. OTUs identified as being differentially abundant between different comparisons. The  
 126 first column represents the OTU number as determined during OTU picking (see methods for  
 127 details). Taxonomic identification is presented for each taxa, if a taxon was not able to be  
 128 identified to a certain taxonomic level, i.e species, that cell was left blank. Group represents  
 129 which comparison group that taxon was more abundant in.

| Differentially abundant OTUs                          |                |                     |                   |                    |                 |           |           |
|-------------------------------------------------------|----------------|---------------------|-------------------|--------------------|-----------------|-----------|-----------|
|                                                       | Phylum         | Class               | Order             | Family             | Genus           | Species   | group     |
| Antibiotic treated fir: guts vs diet                  |                |                     |                   |                    |                 |           |           |
| denovo8018                                            | Proteobacteria | Gammaproteobacteria | Oceanospirillales | Halomonadaceae     | Halomonas       |           | gut       |
| Untreated fir: guts vs diet                           |                |                     |                   |                    |                 |           |           |
| denovo5188                                            | Proteobacteria | Alphaproteobacteria | Rhizobiales       | Methylocystaceae   |                 |           | diet      |
| denovo92                                              | Proteobacteria | Alphaproteobacteria | Rhodospirillales  | Acetobacteraceae   |                 |           | diet      |
| Antibiotic treated spruce: guts vs diet               |                |                     |                   |                    |                 |           |           |
| denovo2429                                            | Firmicutes     | Bacilli             | Bacillales        | Staphylococcaceae  | Staphylococcus  |           | diet      |
| denovo4501                                            | Proteobacteria | Betaproteobacteria  | Burkholderiales   | Burkholderiaceae   |                 |           | diet      |
| denovo5458                                            | Firmicutes     | Bacilli             | Lactobacillales   | Enterococcaceae    | Enterococcus    |           | diet      |
| Untreated spruce: guts vs diet                        |                |                     |                   |                    |                 |           |           |
| denovo2287                                            | Proteobacteria | Gammaproteobacteria | Enterobacteriales | Enterobacteriaceae | Erwinia         |           | diet      |
| denovo1313                                            | Proteobacteria | Gammaproteobacteria | Pseudomonadales   | Pseudomonadaceae   | Pseudomonas     |           | diet      |
| denovo699                                             | Proteobacteria | Betaproteobacteria  | Burkholderiales   | Oxalobacteraceae   |                 |           | diet      |
| Antibiotic treated fir: guts vs frass                 |                |                     |                   |                    |                 |           |           |
| denovo8018                                            | Proteobacteria | Gammaproteobacteria | Oceanospirillales | Halomonadaceae     | Halomonas       |           | gut       |
| denovo6600                                            | Actinobacteria | Actinobacteria      | Actinomycetales   | Corynebacteriaceae | Corynebacterium |           | frass     |
| Antibiotic treated fir: guts frass                    |                |                     |                   |                    |                 |           |           |
| denovo2429                                            | Firmicutes     | Bacilli             | Bacillales        | Staphylococcaceae  | Staphylococcus  |           | frass     |
| Untreated spruce: guts vs frass                       |                |                     |                   |                    |                 |           |           |
| denovo2961                                            | Firmicutes     | Bacilli             | Lactobacillales   | Streptococcaceae   | Streptococcus   |           | gut       |
| denovo2429                                            | Firmicutes     | Bacilli             | Bacillales        | Staphylococcaceae  | Staphylococcus  |           | frass     |
| denovo4154                                            | Tenericutes    | Mollicutes          |                   |                    |                 |           | frass     |
| All samples combined: guts vs foliage                 |                |                     |                   |                    |                 |           |           |
| denovo5188                                            | Proteobacteria | Alphaproteobacteria | Rhizobiales       | Methylocystaceae   |                 |           | diet      |
| denovo2840                                            | Cyanobacteria  | Chloroplast         | Streptophyta      |                    |                 |           | diet      |
| denovo6382                                            | Firmicutes     | Bacilli             | Lactobacillales   | Streptococcaceae   | Streptococcus   |           | diet      |
| denovo1313                                            | Proteobacteria | Gammaproteobacteria | Pseudomonadales   | Pseudomonadaceae   | Pseudomonas     |           | diet      |
| denovo2429                                            | Firmicutes     | Bacilli             | Bacillales        | Staphylococcaceae  | Staphylococcus  |           | diet      |
| denovo4501                                            | Proteobacteria | Betaproteobacteria  | Burkholderiales   | Burkholderiaceae   |                 |           | diet      |
| denovo699                                             | Proteobacteria | Betaproteobacteria  | Burkholderiales   | Oxalobacteraceae   |                 |           | diet      |
| All samples combined: guts vs frass                   |                |                     |                   |                    |                 |           |           |
| denovo2961                                            | Firmicutes     | Bacilli             | Lactobacillales   | Streptococcaceae   | Streptococcus   |           | frass     |
| denovo2429                                            | Firmicutes     | Bacilli             | Bacillales        | Staphylococcaceae  | Staphylococcus  |           | frass     |
| denovo4154                                            | Tenericutes    | Mollicutes          |                   |                    |                 |           | gut       |
| All samples combined: antibiotic treated vs untreated |                |                     |                   |                    |                 |           |           |
| denovo92                                              | Proteobacteria | Alphaproteobacteria | Rhodospirillales  | Acetobacteraceae   |                 |           | untreated |
| denovo4462                                            | Actinobacteria | Actinobacteria      | Actinomycetales   | Micrococcaceae     | Kocuria         | palustris | untreated |
| All samples combined: spruce vs fir                   |                |                     |                   |                    |                 |           |           |
| denovo1881                                            | Proteobacteria | Gammaproteobacteria | Oceanospirillales | Halomonadaceae     | Halomonas       |           | fir       |
